# Supplementary material for: Biodegradable and crosslinkable PPF–PLGA–PEG self-assembled nanoparticles dual-decorated with folic acid ligands and Rhodamine B fluorescent probes for targeted cancer imaging
Source: Royal Society of Chemistry journal article supplement (doi:10.1039/c5ra04096e), 2015-01-01
Supplement: c5ra04096e1.pdf [file c5ra04096e1.pdf]

# Supporting Information

## **Biodegradable and crosslinkable PPF-PLGA-PEG self-assembled nanoparticles dual-decorated with folic acid ligands and rhodamine B fluorescent probes for targeted cancer imaging**

Xifeng Liu,<sup>ab</sup> A. Lee Miller II,<sup>ab</sup> Michael J. Yaszemski<sup>ab</sup> and Lichun Lu<sup>\*ab</sup>

<sup>a</sup> Department of Orthopedic Surgery, Mayo Clinic, Rochester, MN 55905, USA.

<sup>b</sup> Department of Physiology and Biomedical Engineering, Mayo Clinic, Rochester, MN 55905, USA

\*Email: Lu.Lichun@mayo.edu

## 1. Experimental

### **Polymer Synthesis**

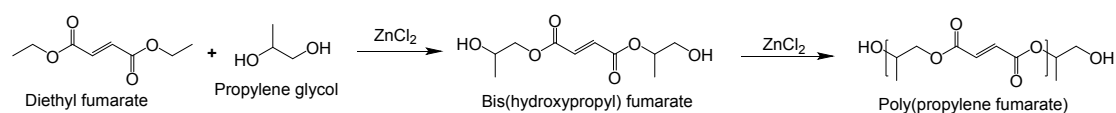

**Fig. S1** Synthesis route for poly(propylene fumarate).

## 2. Results

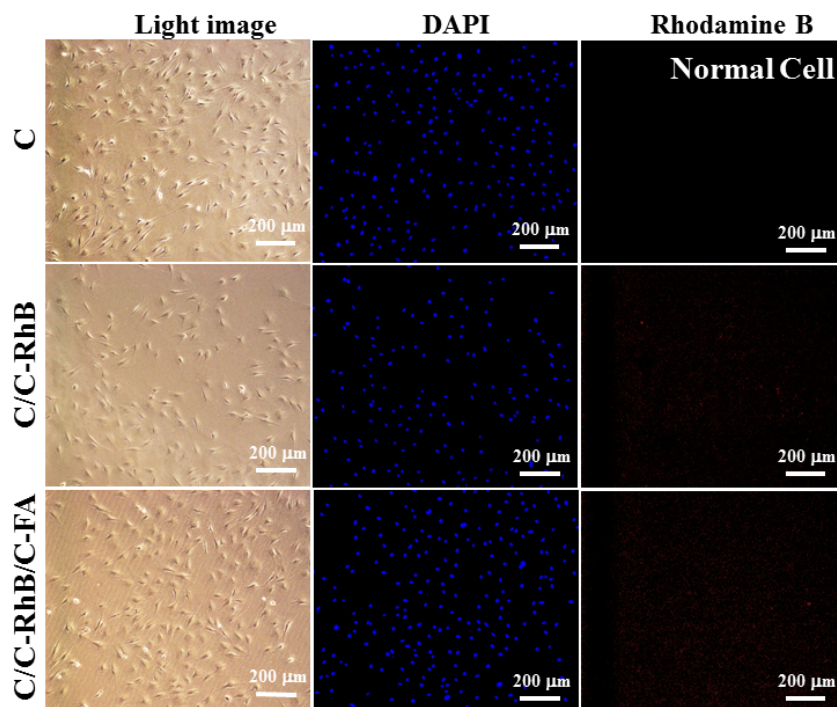

**Fig. S2** Cellular uptake of crosslinked nanoparticles with or without FA ligand in normal cells.

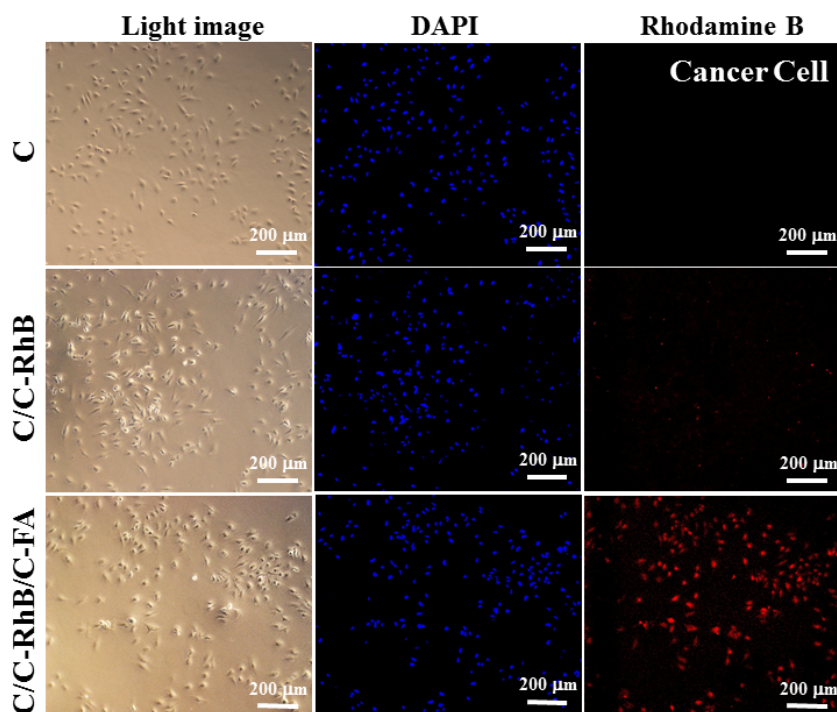

**Fig. S3** Cellular uptake of crosslinked nanoparticles with or without FA ligand in cancer cells.
